# Supplementary material for: GX15-070 (obatoclax) overcomes glucocorticoid resistance in acute lymphoblastic leukemia through induction of apoptosis and autophagy
Source: PubMed Central journal article supplement — Cell Death Dis. 2010 Sep 16;1(9):e76–. doi: 10.1038/cddis.2010.53 (PMC3032343; doi:10.1038/cddis.2010.53), 2010-09-16

## **Supplementary Data**

### **Figure S1. PI3K inhibitors do not affect autophagy induced by GX15-070.**

CEM cells were treated with 100 nM GX15-070  $\pm$  3-MA (5 mM) (a) or  $\pm$  LY294002 (10, 50  $\mu$ M) (b) for 24h. Cell lysates were subjected to Western blot analyses to detect LC3 conversion.

### **Figure S2. Anti-apoptotic BCL-2 family proteins are overexpressed in Dex-resistant T-ALL cells.**

The level of MCL-1, BCL-X<sub>L</sub>, and BCL-2 were determined by Western blotting in CEM (Dex-sensitive) or Molt-4, Reh, HSB-2, and Jurkat (Dex-resistant) cells.

**Figure S1**

**a**

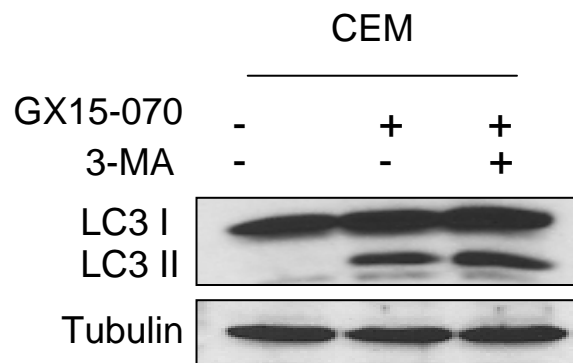

**b**

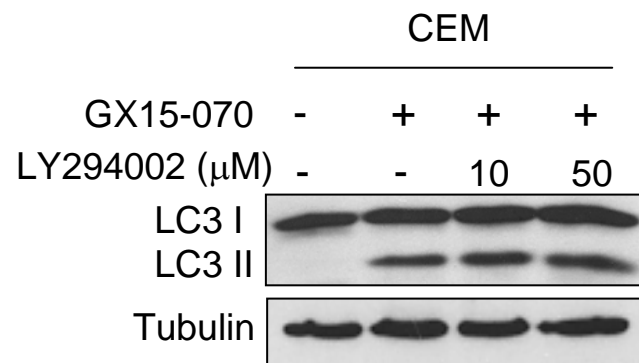

**Figure S2**

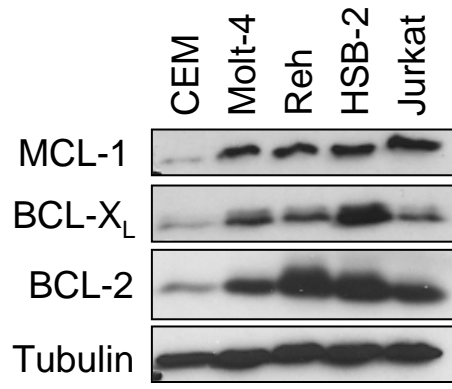

Supplement: cddis201053x1.pdf [file cddis201053x1.pdf]
